# Supplementary material for: Association between Geriatric 8 (G8) Scores and Self-Care Decline in Elderly Patients with Head and Neck Squamous Cell Carcinoma Undergoing Radiotherapy
Source: Research Square preprint supplement (doi:10.21203/rs.3.rs-6689251/v1), 2025-07-02
Supplement: Supplementary file 1 [file ad8e05eb5e2b9dbf7c105e29.docx]

**Supplementary Materials**

| Table S1. Details of the Geriatric 8 screening tool | | |
| --- | --- | --- |
|  | Item | Score |
| 1 | Has food intake declined over the past 3 months due to loss of appetite, digestive problems, chewing or swallowing difficulties? | 0: severe decrease in food intake  1: moderate decrease in food intake  2: no decrease in food intake |
| 2 | Recent weight loss (< 3 months) | 0: weight loss > 3 kg  1: does not know  2: weight loss between 1 and 3 kg  3: no weight loss |
| 3 | Mobility | 0: bed or chair bound  1: able to get out of bed/chair but does not go out  2: goes out |
| 4 | Neuropsychological problems | 0: severe dementia or depression  1: mild dementia or depression  2: no psychological problems |
| 5 | BMI: weight in kg/ (height in m2) | 0: BMI < 19  1: 19 ≤ BMI < 21  2: 21 ≤ BMI < 23  3: BMI ≥ 23 |
| 6 | Do you take more than 3 medications per day? | 0: yes  1: no |
| 7 | In comparison with other people of the same age, how does the patient consider his/her health status? | 0: not so good  0.5: does not know  1: just as well  2: better |
| 8 | Age | 0: >85 years  1: 80–85 years  2: ≤80 years |
|  | Total Score | 0-17 |
|  | Abbreviation: BMI, body mass index. | |

| Table S2. The details score of the Geriatric 8 screening tool. | | | | |
| --- | --- | --- | --- | --- |
|  | Item | Score | Number of patients (*N* = 66) | Mean Score |
| 1 | Food intake in the last 3 months | 0 | 2 | 1.9 |
| 1 | 4 |
| 2 | 60 |
| 2 | Recent weight loss (< 3 months) | 0 | 10 | 2.3 |
| 1 | 1 |
| 2 | 13 |
| 3 | 42 |
| 3 | Mobility | 0 | 1 | 1.9 |
| 1 | 4 |
| 2 | 61 |
| 4 | Neuropsychological problems | 0 | 1 | 1.9 |
| 1 | 4 |
| 2 | 61 |
| 5 | BMI: weight in kg/ (height in m2) | 0 | 9 | 2.0 |
| 1 | 13 |
| 2 | 12 |
| 3 | 32 |
| 6 | Polypharmacy (Takes ≥3 medications per day) | 0 | 39 | 0.4 |
| 1 | 27 |
| 7 | Self-rated health status (compared to the same age people) | 0 | 9 | 1.3 |
| 0.5 | 6 |
| 1 | 18 |
| 2 | 33 |
| 8 | Age | 0 | 5 | 1.7 |
| 1 | 7 |
| 2 | 54 |
|  | Total Score |  |  | 13.5 |
| Abbreviation: BMI, body mass index. | | | | |
